# Supplementary material for: Increasing hurricane intensity in the Caribbean is linked to rising subsurface ocean temperatures
Source: Research Square preprint supplement (doi:10.21203/rs.3.rs-8680876/v1), 2026-02-16
Supplement: Supplementary file 1 [file 7b1a8c4fb077a93d02236037.docx]

**Supplementary Information**


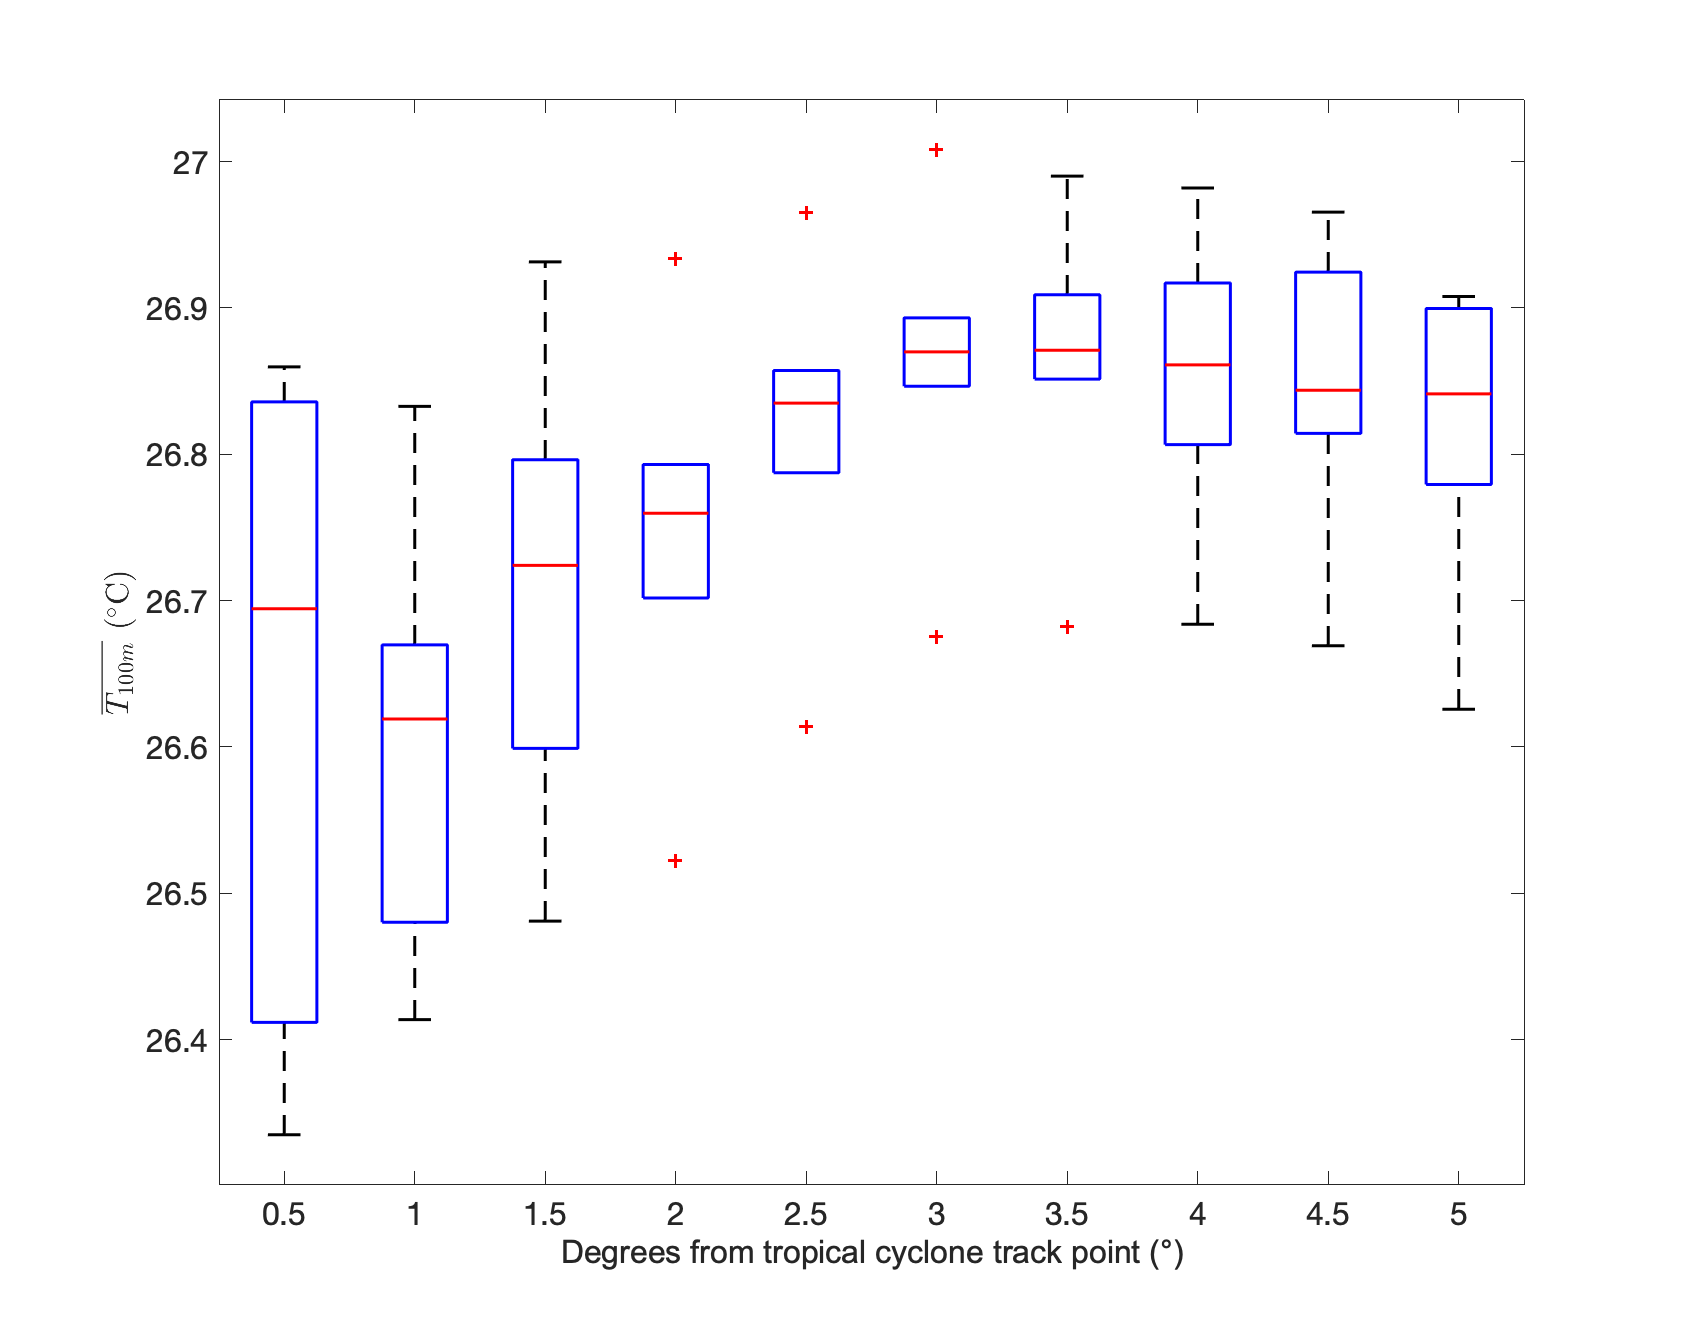


Supplementary Figure 1 Ocean temperature variability 1980-2023 up to 5 degrees from the TC track point and up to 30 days in advance**.**

Supplementary Table 1 Caribbean TC wind pressure relationship examples by latitude band based on HURDAT2 historical data. The RMSE by latitude band is also shown

| MSW (kts) | Minimum Pressure (mb) | | | |
| --- | --- | --- | --- | --- |
| 10-15ºN | 15-20ºN | 20-25ºN | 25-30ºN |
| 50 | 1000 | 998 | 997 | 996 |
| 100 | 966 | 964 | 958 | 958 |
| 150 | 914 | 911 | 903 | 908 |
| RMSE | 4.8 | 5.1 | 6 | 6.1 |
